# Supplementary material for: Genetic architecture of human thinness compared to severe obesity
Source: PLoS Genet. 2019 Jan 24;15(1):e1007603. doi: 10.1371/journal.pgen.1007603 (PMC6345421; doi:10.1371/journal.pgen.1007603)
Supplement: S1 Table — (XLSX) [file pgen.1007603.s011.xlsx]

## Sheet: S1 Table
S1 Table. Summary of discovery sample sets.
	STILTS (thin)		SCOOP (obese)		UKHLS (controls)
N total	1622		1985		10433
	Female	Male	Female	Male	Female	Male
N	1325 (81.69%)	297 (18.31%)	1083 (54.56%)	902 (45.44%)	5837 (55.95%)	4596 (44.05%)
Age	36.64 ± 14.33 (mean ± SD)	35.17 ± 14.50 (mean ± SD)	10.74 ± 7.44 (mean ± SD)	10.93 ± 7.09 (mean ± SD)	52.02 ± 16.73 (mean ± SD)	52.67 ± 17.31 (mean ± SD)
BMI	17.56 ± 0.93 (mean ± SD)	17.56 ± 1.06 (mean ± SD)	33.66 ± 9.47 (mean ± SD)	34.41 ± 10.61 (mean ± SD)	26.98 ± 7.94 (mean ± SD)	26.86 ± 7.83 (mean ± SD)
BMI sds (children)			3.70 ± 0.83 (mean ± SD)	3.83 ± 0.87 (mean ± SD)
BMI centile	0.028		0.0015
Sex difference STILTS vs UKHLS: p<0.001, Fishers test
Age difference SCOOP vs STILTS: p<0.001, t-test
Age difference SCOOP vs UKHLS: p<0.001, t-test
Age difference STILTS vs UKHLS: p<0.001, t-test
